# Supplementary material for: Distribution and morphology of non-persistent and persistent contrail formation areas in ERA5
Source: Copernicus journal article supplement (doi:10.5194/egusphere-2023-3086), 2024-01-11
Supplement: Supplementary file [file egusphere-2023-3086-AC2-supplement.pdf]

## Reply to Reviewer #2

(Referee comment on "Distribution and morphology of non-persistent and persistent contrail formation areas in ERA5" by K. Wolf et al. (egusphere-2023-3086), <https://doi.org/10.5194/egusphere-2023-3086-RC2>, 2024)

We thank the Reviewer for the time she/he spent on the manuscript, and for the useful comments. Addressing the comments has improved the manuscript.

For better legibility, the Reviewer's comments are highlighted in **bold** and changes in the manuscript are in *italics*.

---

## Review of "Distribution and morphology of non-persistent and persistent contrail formation areas in ERA5" by Wolf et al., egusphere-2023-3086

This paper describes an analysis of the characteristics and morphology of contrail formation regions from the IAGOS aircraft data and the ERA5 reanalysis. The focus is on the North Atlantic flight track around cruise altitudes. Characterising regions of persistent contrail formation is important and very relevant for the potential mitigation of the climate impact of aircraft flights by rerouting. There are a number of interesting results from the analysis, with an overall conclusion that some persistent contrail regions will be difficult to avoid by rerouting aircraft because of their large vertical and horizontal extents and their frequent collocation with the jet stream.

The paper is well written and logically presented and is appropriate for ACP. I have one main comment and several minor corrections that need to be addressed.

We thank the Reviewer for the positive appreciation of our manuscript.

### MAIN COMMENT

Should the crossing length for ERA5 in Figure 1 and Table 2 have values less than the grid length of 14km - 24km (i.e. values in Fig 1 for ERA5 go down to less than 1km - the native IAGOS resolution - and Table 2 has a 10th percentile for ERA5 PC of 9km)? Line 211 says "short crossing lengths occur less frequently and cannot by construction be smaller than grid-box size". I assume the reason for small lengths is because the flight track can cut the corner of a grid cell, but then the above sentence is not correct and the reason should be made clear in the text. Whether this makes sense is another matter, as the ERA5 data is not providing useful information less than the grid length (and probably several grid lengths). Would a different methodology (e.g. a flight track at the resolution of the grid) lead to a significant difference in the results/conclusions?

The Reviewer addresses an important point.

In the version of the manuscript that the Reviewer reviewed, we used IAGOS measurements with their native temporal resolution of four seconds. The distance (segment length) between two IAGOS measurements has been approximated as the great circle distance. As a result, the smallest possible distance that could appear in the contrail length statistics is therefore around one kilometer – both in the original IAGOS data and in the collocated ERA5 data. One can interpret this as an aircraft-centered perspective. To

address the Reviewer's comment, we now follow two approaches In the revised manuscript:

(i) An aircraft-centered approach where IAGOS measurements are averaged over 1-km segments. As the Reviewer correctly points out, that poses problems in cases where the IAGOS flight track crosses a contrail-forming region tangentially. So that might not be a fair comparison.

(ii) A model-centered approach, where segments are 19-km long. Here, the limitation is the suppression of contrail features that are smaller than this distance The length of 19 km has been selected according to the average Cartesian grid box resolution of ERA5 (0.25°) in the investigated latitude band. The data is up-scaled and a 19-km segment is flagged for NPC, PC, R, or NoC based on the flag that occurs most frequently over the 19 km section. As a result, the minimum path length is 19 km. Potential smaller-scale contrail features are now down-weighted and suppressed. Based on the updated plot, we revised the section of the text. Due to the extent of the revisions, we direct the Reviewer to the revised manuscript and the track-changes document.

## MINOR CORRECTIONS

**Section 2.2 Regarding interpolation of the ERA5 data, it should be noted here that there is already some interpolation from the native grid of ERA5 (reduced gaussian TL639 grid, ~31km approx equally spaced grid, and 137 hybrid sigma-pressure coordinate levels) to the lat/lon 0.25 degree grid and fixed pressure levels. e.g. <https://confluence.ecmwf.int/display/CKB/ERA5%3A+What+is+the+spatial+reference>**

We agree with the Reviewer that this is an important point. We now mention that ERA5 is a spectral model that internally operates at an approximate resolution of 31 km. The text has been modified as following:

*"[...] The ERA5 data set was generated with the ECMWF Integrated Forecasting System (IFS) cycle Cy41r2 (operational in 2016). ERA5 is a spectral model with an internal resolution of approximately 31 km. Therefore, the HRES product on the 0.25° Cartesian grid represents interpolated values from the coarser internal Gaussian grid (Hersbach et al. (2020))."*

### **Line 138 Duplication of "fixed grid resolution"**

The second instance has been removed.

### **Line 147 bellow → below**

The typo has been corrected.

**Line 156 Given the "reservoir (R)" conditions are mentioned, it is worth just mentioning briefly in one sentence what this refers to, as it may not be obvious to the reader and shouldn't require looking up in a different paper.**

Following this comment, we added a sentence to text which now reads as follows:

*"Within this study we use the revised version of the SAc following Schumann (1996) and Rap et al. (2010). General details on the SAc and equations required to calculate Tcrit and rcrit can be found in Rap et al. (2010) or Wolf et al. (2023a). Within the present study the same definitions and nomenclature as in Wolf et al. (2023a) are used, and data points are*

*categorized for non-persistent contrails (NPC), persistent contrails (PC), and reservoir (R) conditions. Data points that are flagged for NPC fulfill the SAc, but the ambient air is sub-saturated with respect to ice ( $100\% < r_{ice}$ ). Samples that are flagged for PC fulfill the SAc and are saturated with respect to ice ( $r_{ice} > 100\%$ ). Data points that are flagged for reservoir conditions fulfill the criteria for ice-supersaturation but fail the SAc. Discussion on the Reservoir category can be found in Wolf et al. (2023a). All data points that are not assigned to one of the groups are labeled as non-contrail (NoC)."*

**Line 340 relative -> relatively**

The typo was corrected.

**Line 344 "Figure 5b....indicates that PC regions are generally small..." This part of the sentence is a bit vague and the size of PC regions is already quantified in Fig 4b, so I suggest removing it.**

We followed the suggestion of the Reviewer and removed this part of the sentence.

**Line 426 "...to the 2D binary arrays of PC occurrence." I suggest adding "in the ERA5 dataset." to this sentence for clarity.**

Following the suggestion of the Reviewer the proposed wording has been added to the text.

**Lines 451 and 452 extend -> extent**

The typo was corrected.

**Line 455 "isohumes (lines of constant moisture)" should be "(lines of constant relative humidity)" for clarity.**

Thank you for pointing this out. The sentence has been rephrased according to the suggestion.

**Fig 4. Top right x-axis says "Major axis length" but the caption says "maximum dimension" which is 2x the major axis length.**

The Reviewer is right and we have corrected the plot accordingly. The correct labeling is "Maximum dimension" as it is given in the figure caption and in the text.

**Fig 4. caption 4th line "are are"**

The second "are" has been removed.

**Fig 5. Left axis label says "Major axis length" but the caption says "maximum dimension" which is 2x the major axis length.**

The Reviewer is right and we have corrected the plot accordingly. The correct labeling is "Maximum dimension" as it is given in the figure caption and in the text.
